# Supplementary material
Source: publisher figshare collection journal article supplement (https://future-science-group.figshare.com/ndownloader/files/30904552)
Supplement: Supplementary file 1 [file 30904552]

**SUPPLEMENTARY DATA**


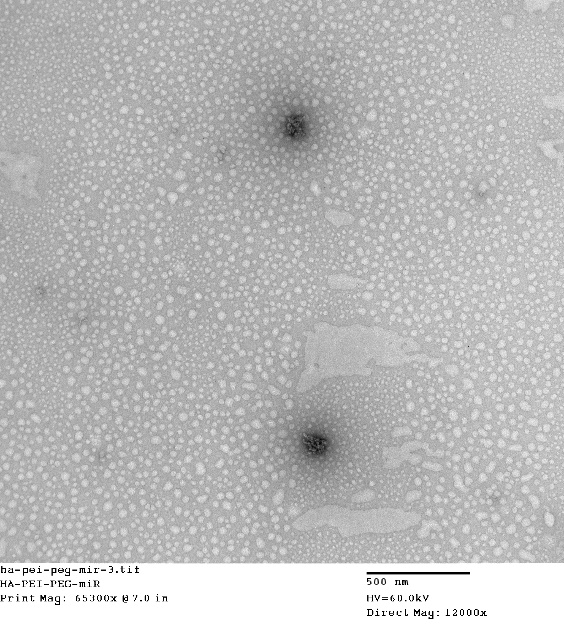


**Supplementary Figure 1:** The HA-PEI/PEG miR particles made at 54:1 ratio in deionized water were visualized by transmission electron microscopy. Scale bar indicates 500 nm.
